# Supplementary material for: Hydrocarbons Biodegradation by Rhodococcus: Assimilation of Hexadecane in Different Aggregate States
Source: MDPI journal article supplement (doi:10.3390/microorganisms10081594), 2022-08-08
Supplement: s1 [file s1]

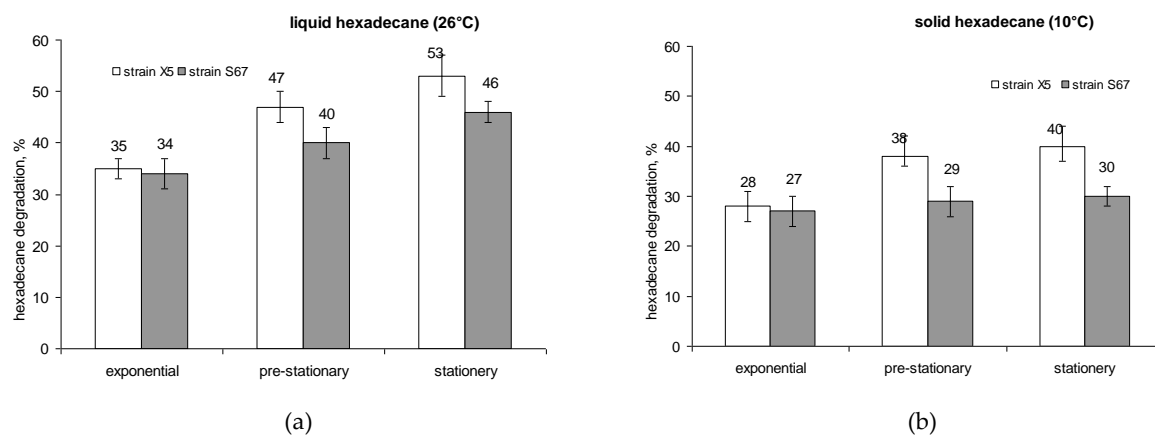

**Figure S1.** Hexadecane degradation by *R. erythropolis* strains X5 and S67 at 26°C (a) and 10°C (b) during batch cultivation in liquid Evans medium.

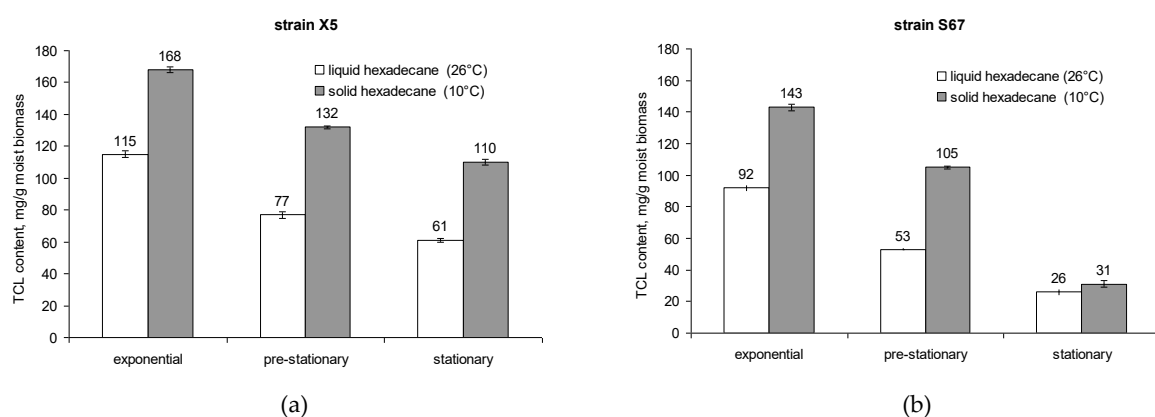

**Figure S2.** Total cell lipids content in X5 (a) and S67 (b) strains during batch cultivation with

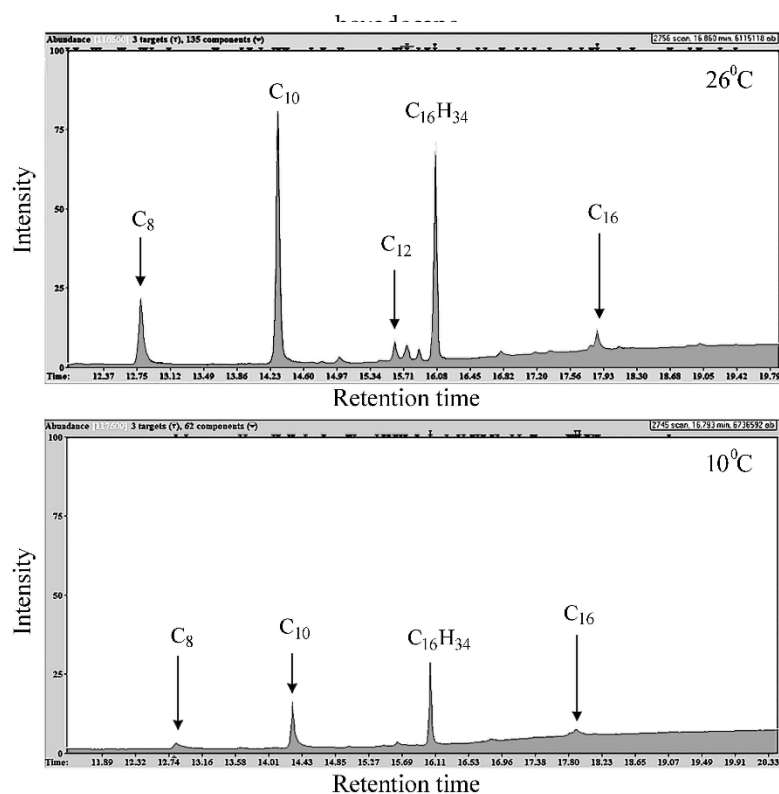

**Figure S3.** Chromatograms of fatty acid methyl esters present in extracellular biosurfactants produced by strain X5 when grown on hexadecane in different aggregate states.

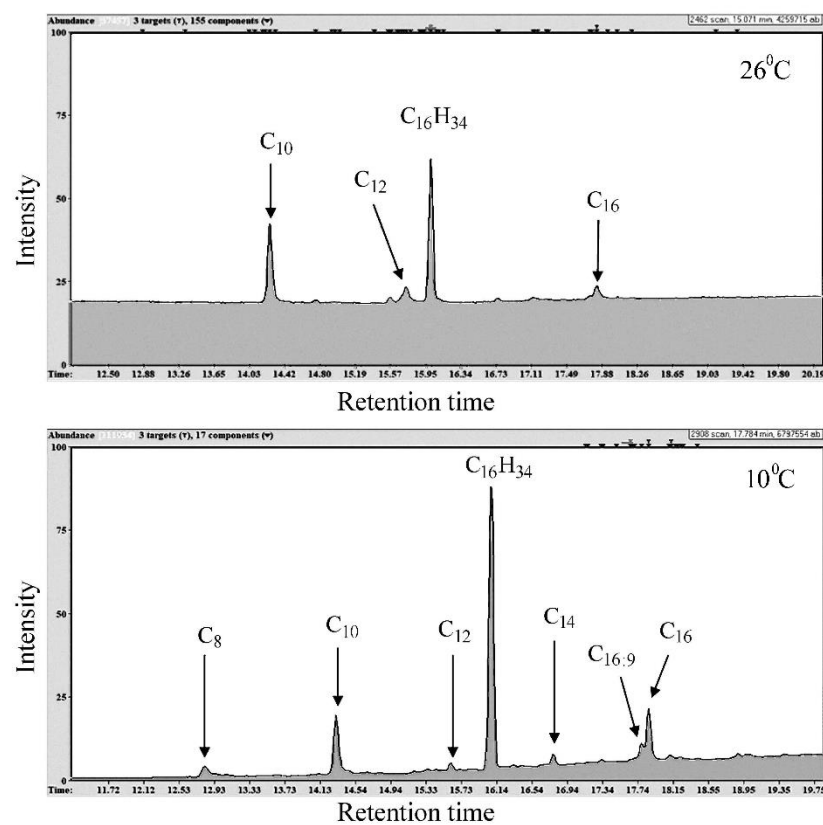

**Figure S4.** Chromatograms of methyl esters of fatty acids present in extracellular biosurfactants produced by strain S67 when grown on hexadecane in different aggregate states.
